# Supplementary material for: Catalytic Allylic Chlorination of Natural Terpenic Olefins Using Supported and Nonsupported Lewis Acid Catalysts
Source: Hindawi journal article supplement (doi:10.1155/2020/2563634), 2020-10-22
Supplement: f1 [file 2563634.f1.pdf]

## SUPPORTING INFORMATION

### Catalytic allylic chlorination of natural terpenic olefins using supported and non-supported Lewis acid catalysts

Ayoub Abdelkader MEKKAOUI,<sup>1,2\*</sup> Mouhsine LAAYATI,<sup>1,2</sup> Hamza ORFI,<sup>1,2</sup> Larbi EL FIRDOUSSI,<sup>2</sup> and Soufiane EL HOUSAME<sup>1\*</sup>

<sup>1</sup> Laboratoire de Chimie, Modélisation et Sciences de l'environnement, Université Sultan Moulay Slimane, Faculté Polydisciplinaire de Khouribga, B.P 145, 25000 Khouribga, Morocco.

<sup>2</sup> Laboratoire de chimie de Coordination et de Catalyse, Département de Chimie, Faculté des Sciences Semlalia, BP 2390, 40001 Marrakech, Morocco.

\* Corresponding authors:

Tel.: +212 523 490359; fax: +212 523 490354. E-mail address: S. EL HOUSAME: [hous\\_soufiane@hotmail.com](mailto:hous_soufiane@hotmail.com) / A. A. MEKKAOUI: [mekk.ayoub@gamil.com](mailto:mekk.ayoub@gamil.com)

#### ✚ Spectral data of chlorinated compounds:

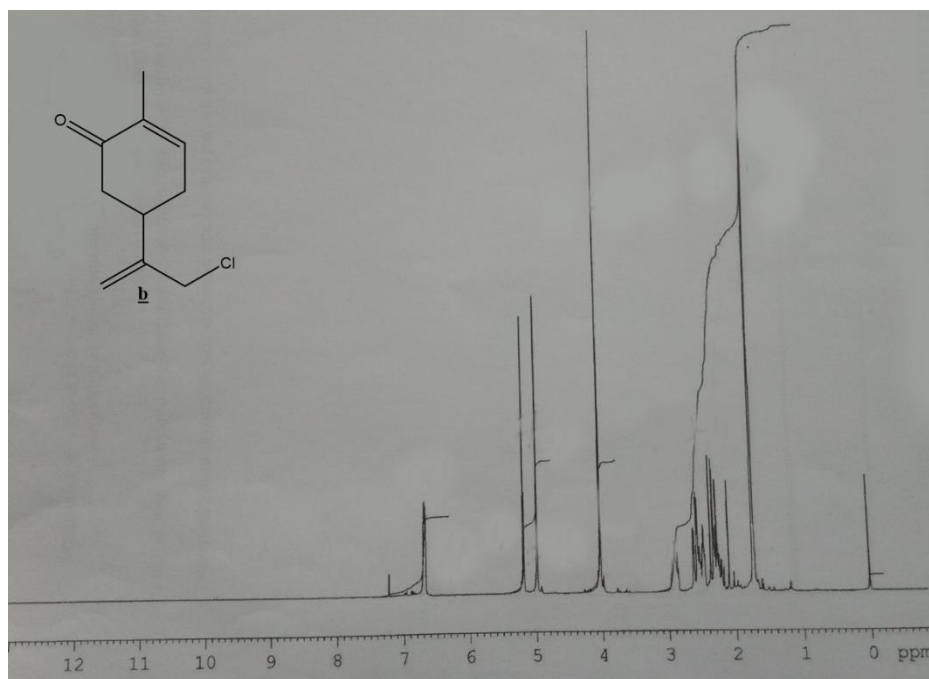

Figure S1: <sup>1</sup>H NMR spectrum of the product **b**.

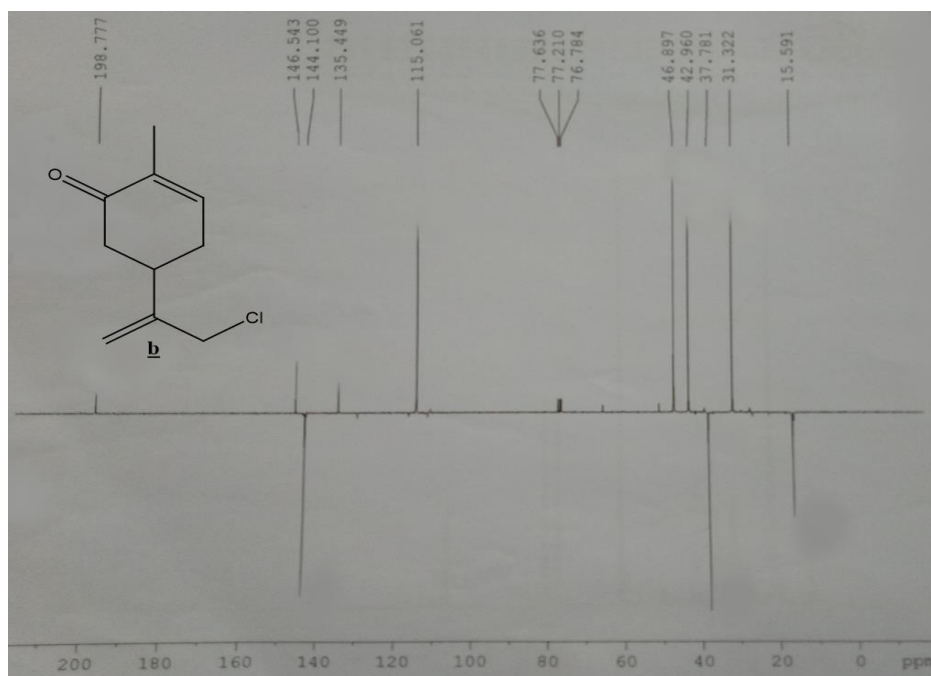

Figure S2: APT spectrum of the product **b**.

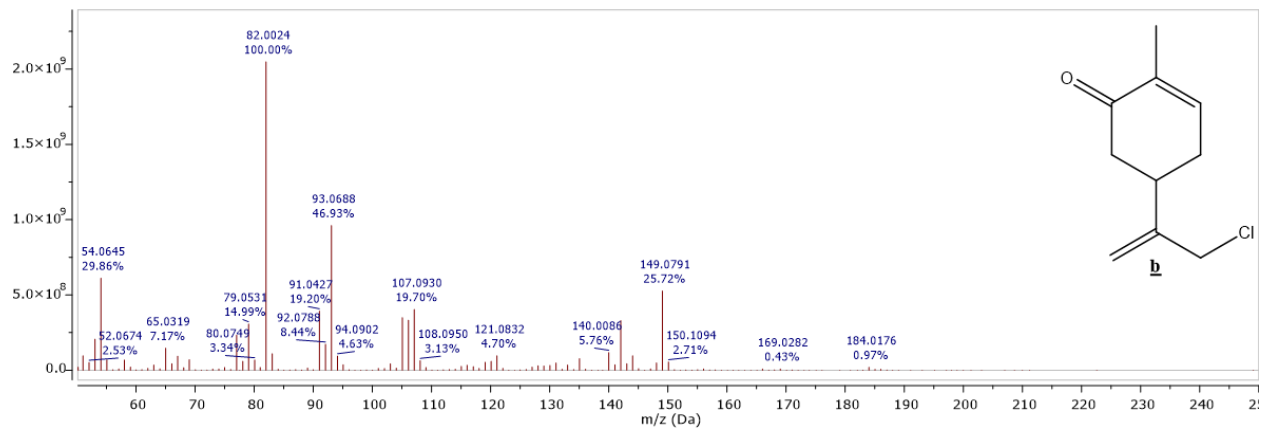

Figure S3: MS spectrum of the product **b**.

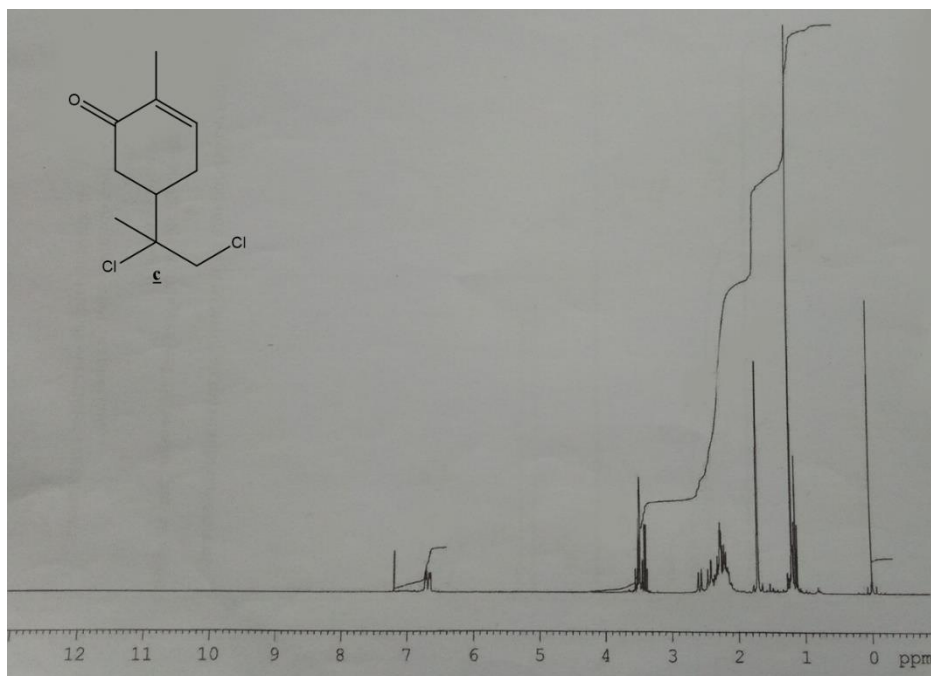

Figure S4: <sup>1</sup>H NMR spectrum of the product **c**.

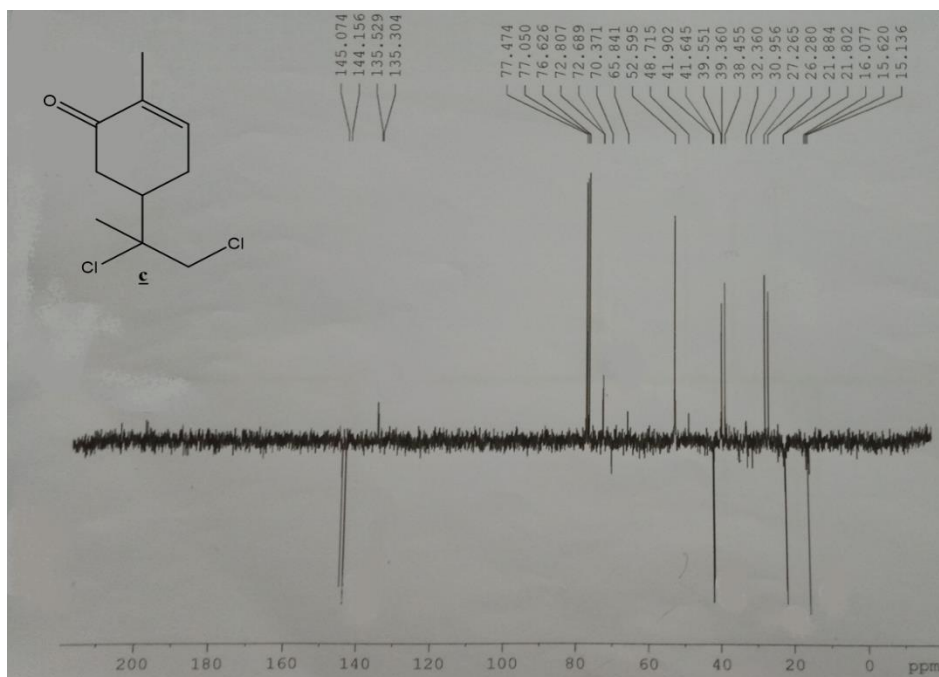

Figure S5: APT spectrum of the product **c**.

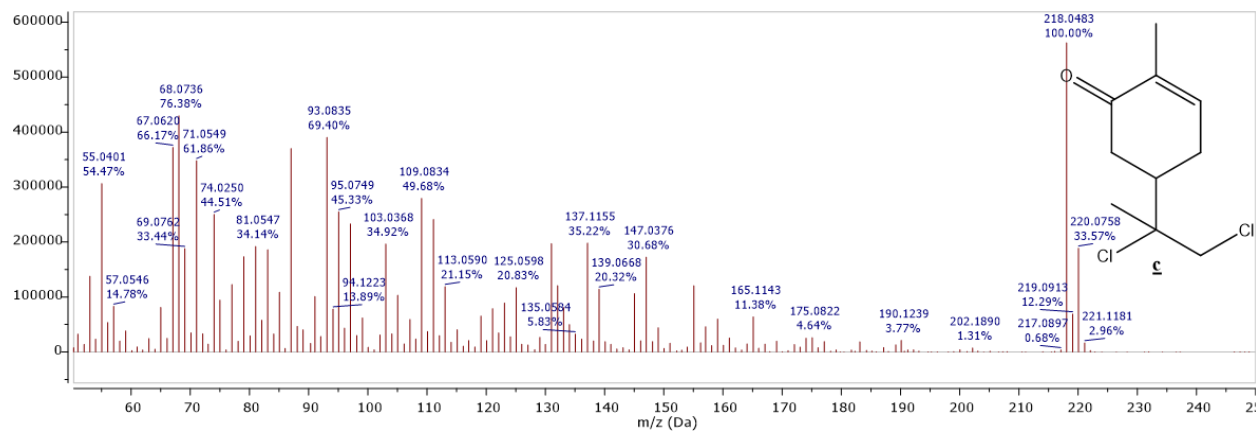

Figure S6: MS spectrum of the product **e**.

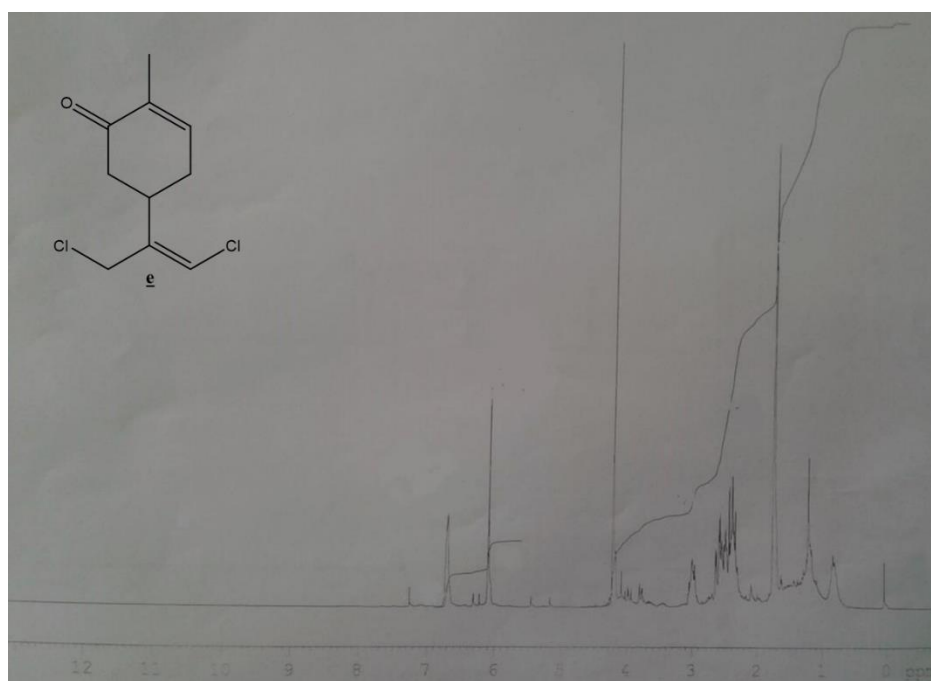

Figure S7: <sup>1</sup>H NMR spectrum of the product **e**.

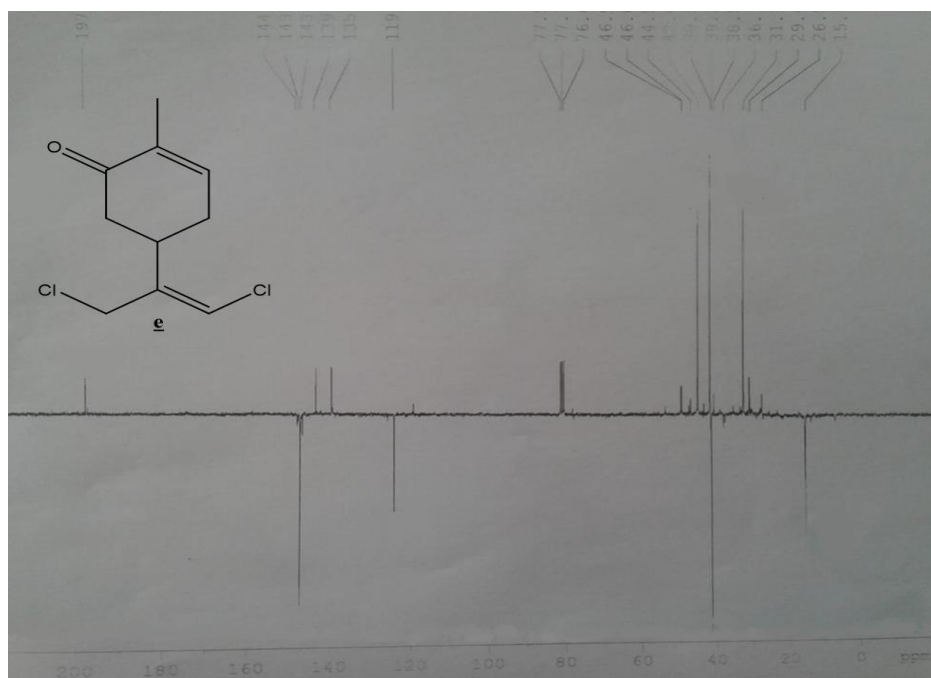

Figure S8: APT spectrum of the product **e**.

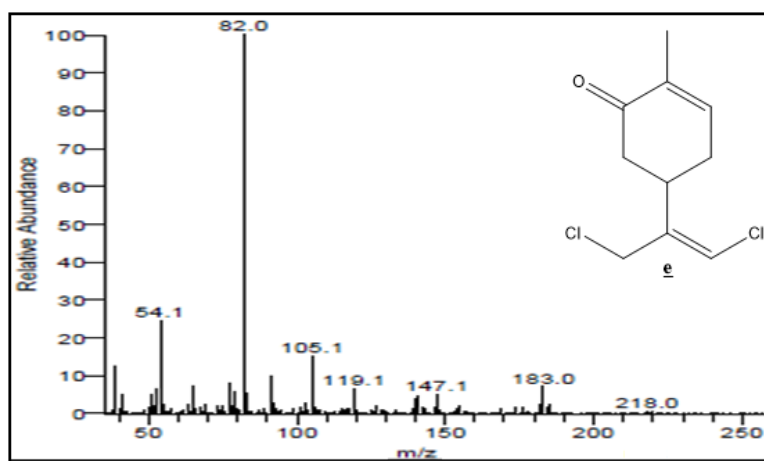

Figure S9: MS spectrum of the product **e**.

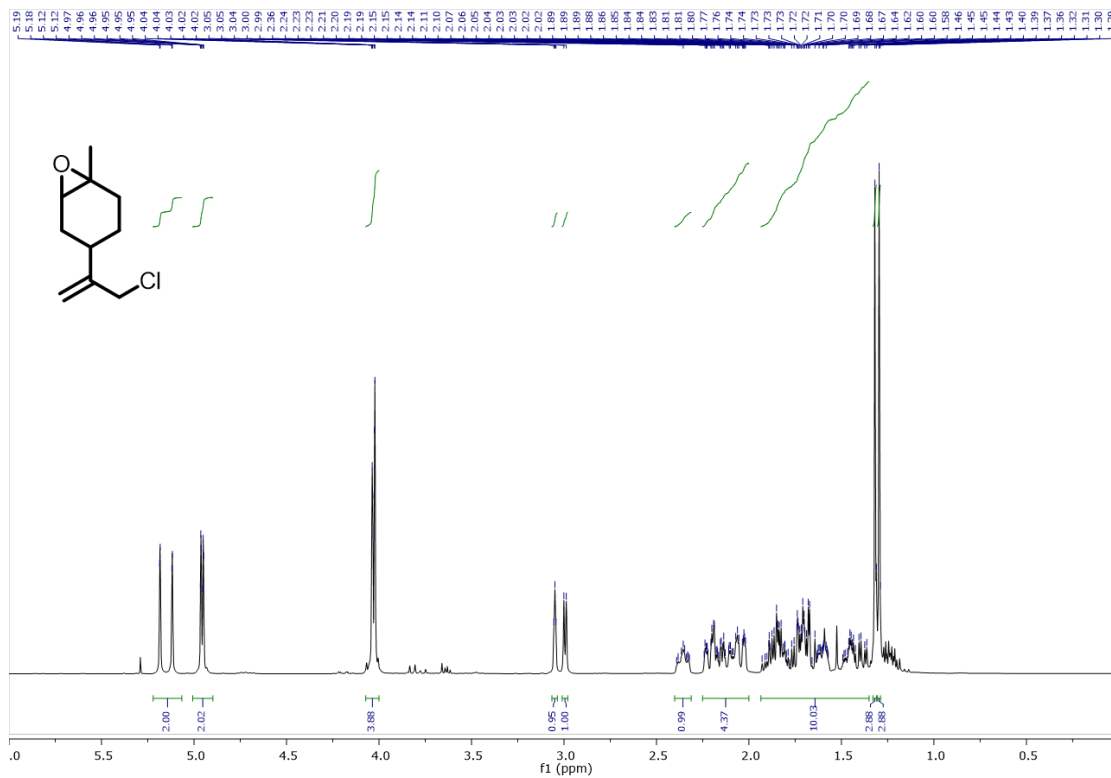

Figure S10:  $^1\text{H}$  NMR spectrum of the limonene oxide monochloride.

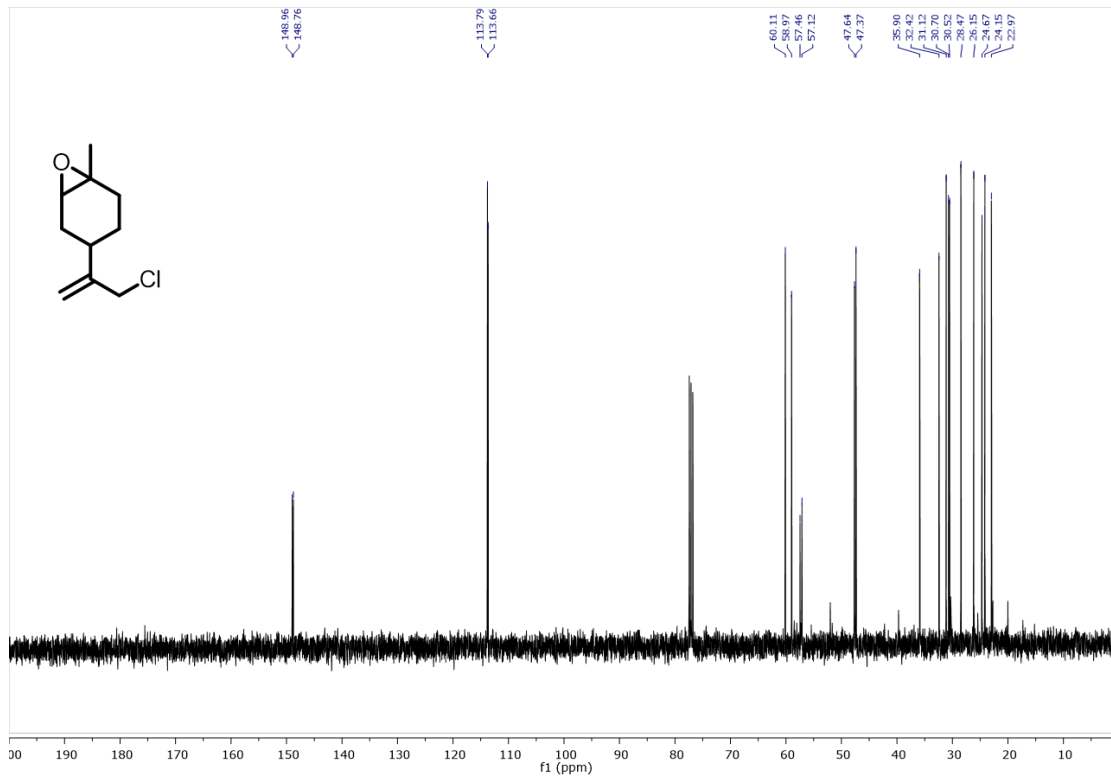

Figure S11:  $^{13}\text{C}$  spectrum of the limonene oxide monochloride.

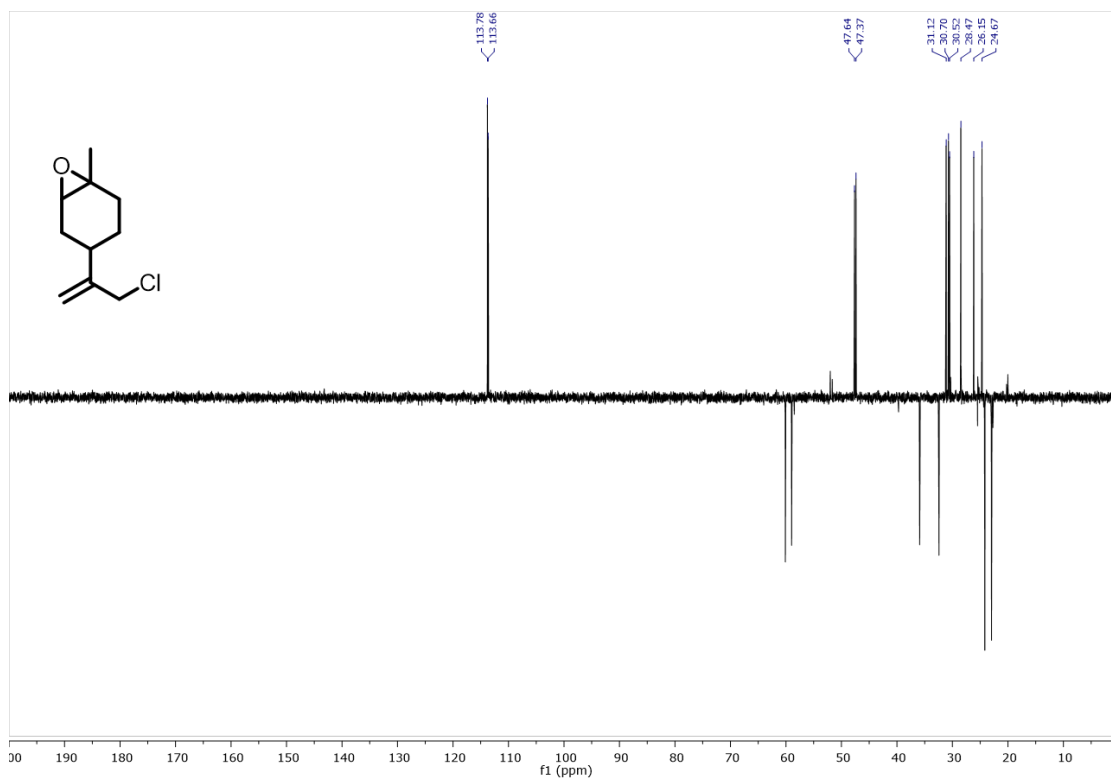

Figure S12: DET 135 spectrum of the limonene oxide monochloride.

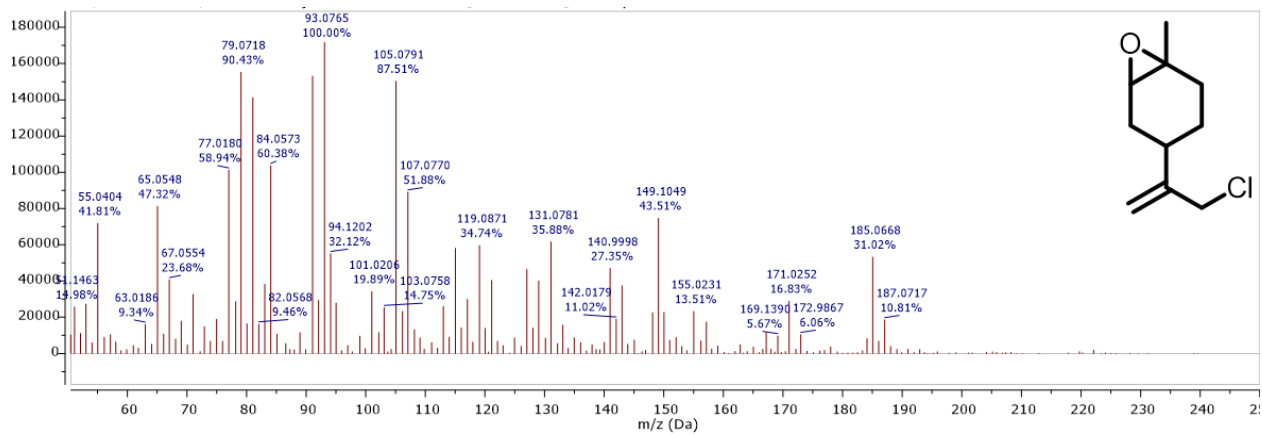

Figure S13: MS spectrum of the limonene oxide monochloride.

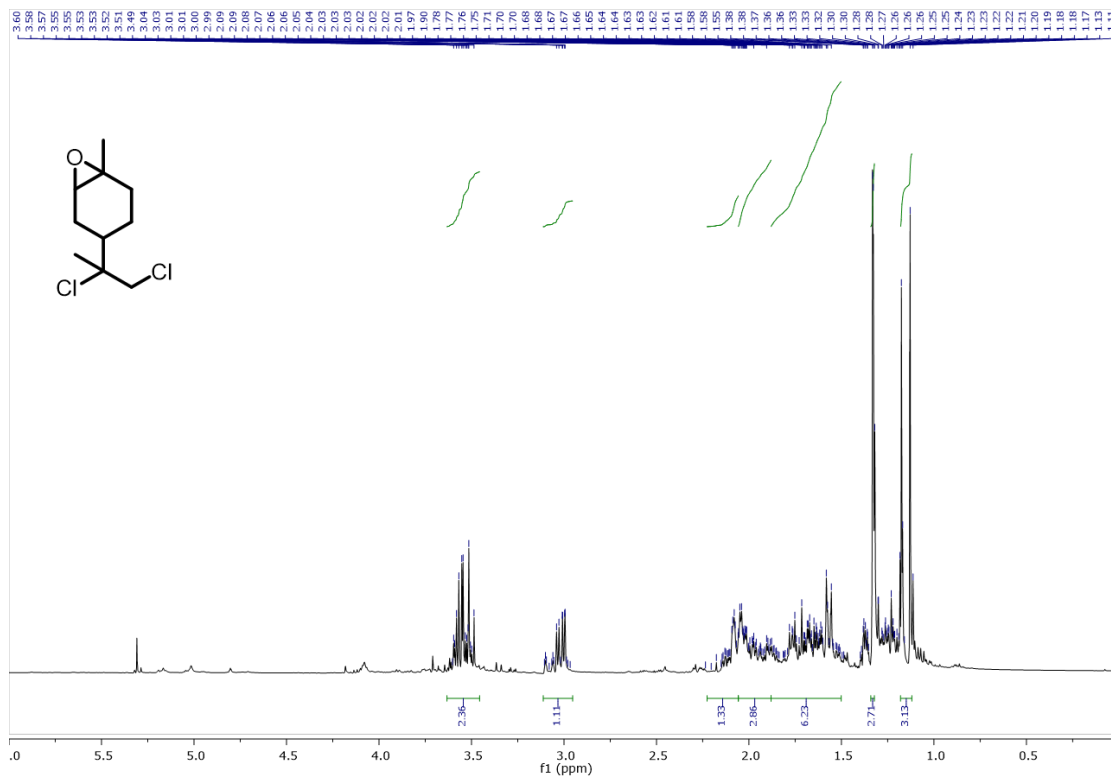

Figure S14:  $^1\text{H}$  NMR spectrum of the limonene oxide dichloride.

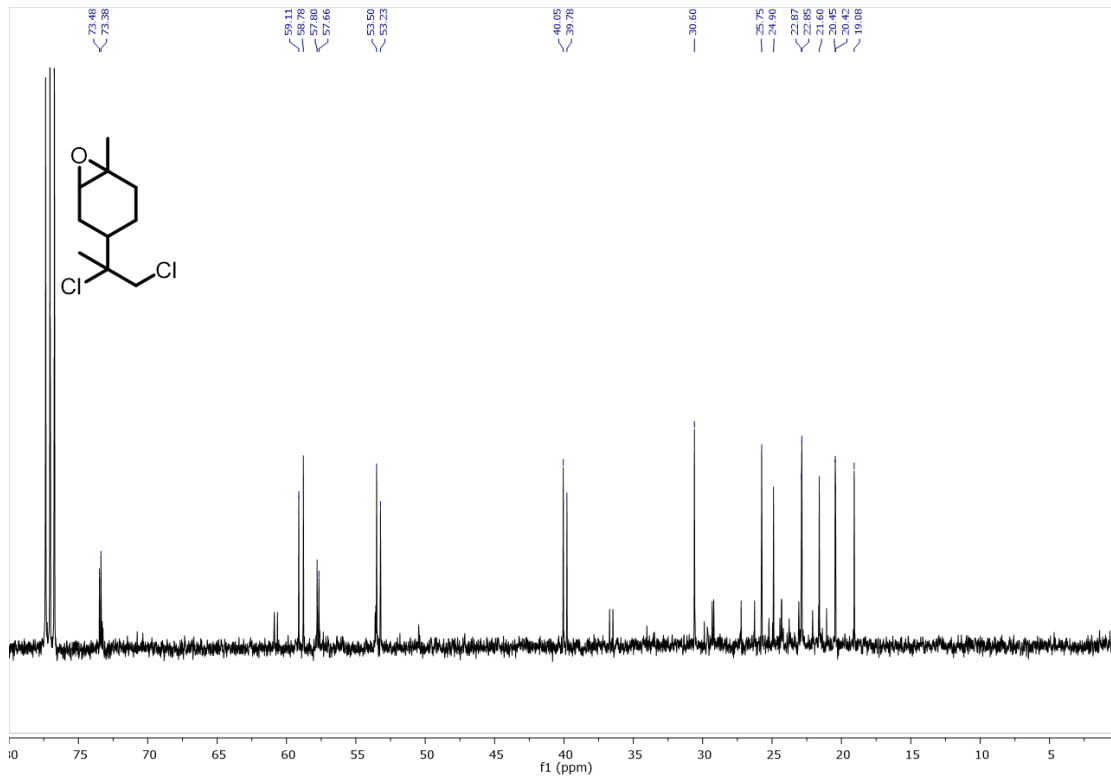

Figure S15:  $^{13}\text{C}$  spectrum of the limonene oxide dichloride.



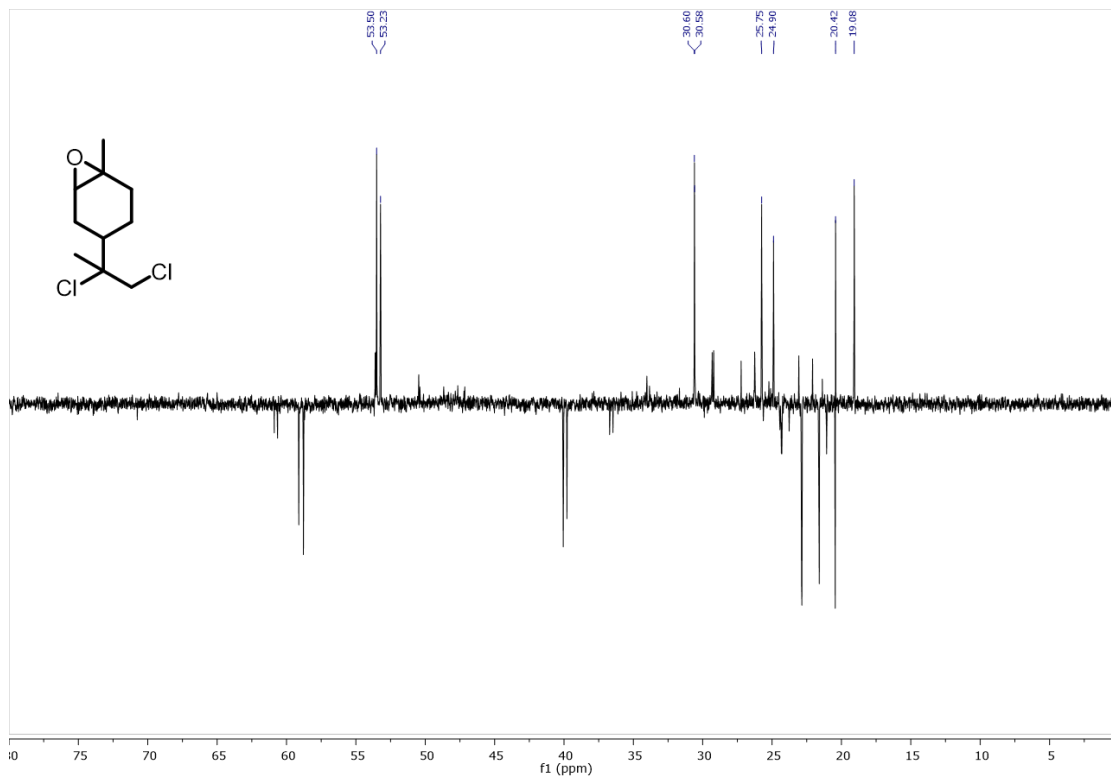

Figure S16: DET 135 spectrum of the limonene oxide dichloride.

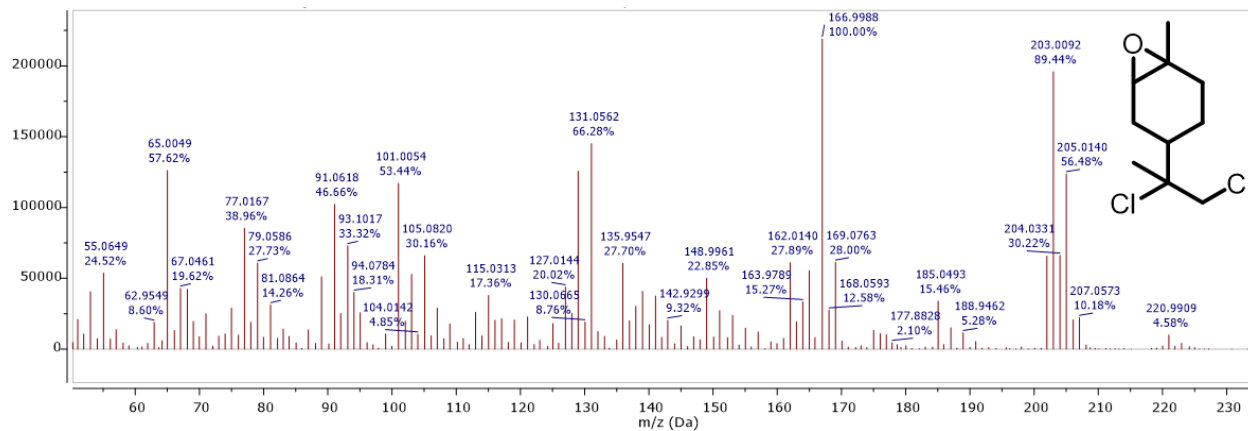

Figure S17: MS spectrum of the limonene oxide dichloride.

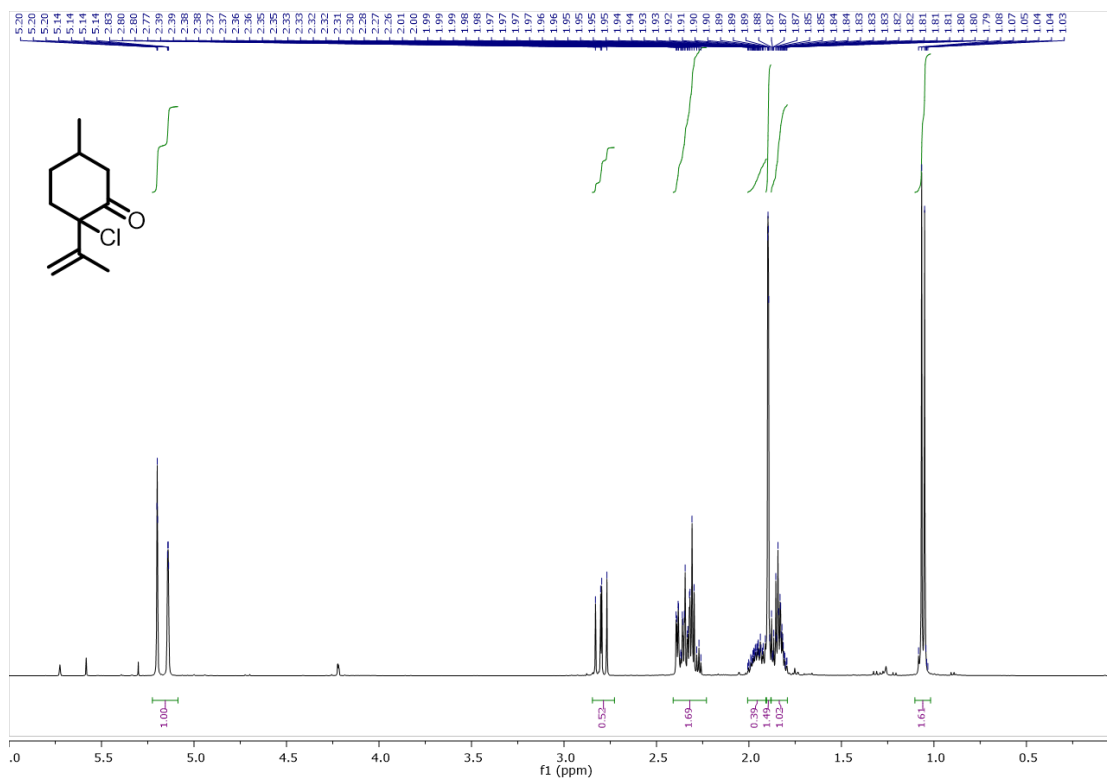

Figure S18:  $^1\text{H}$  NMR spectrum of the pulegone monochloride.

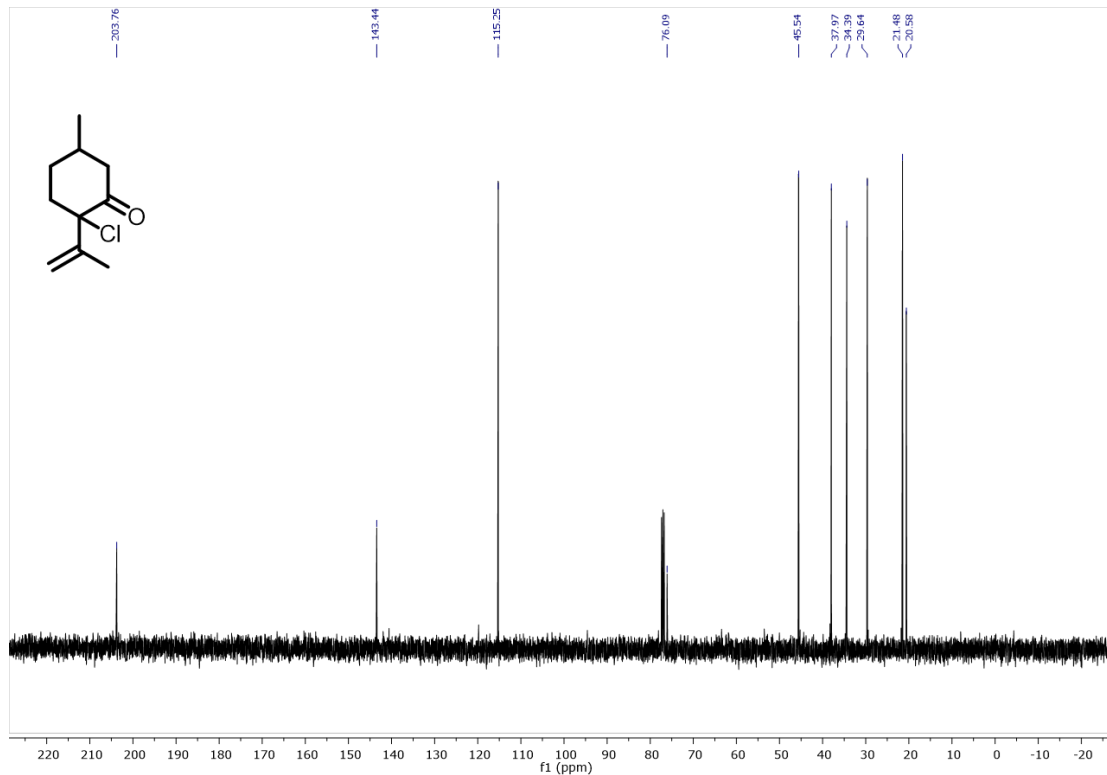

Figure S19:  $^{13}\text{C}$  spectrum of the pulegone monochloride.

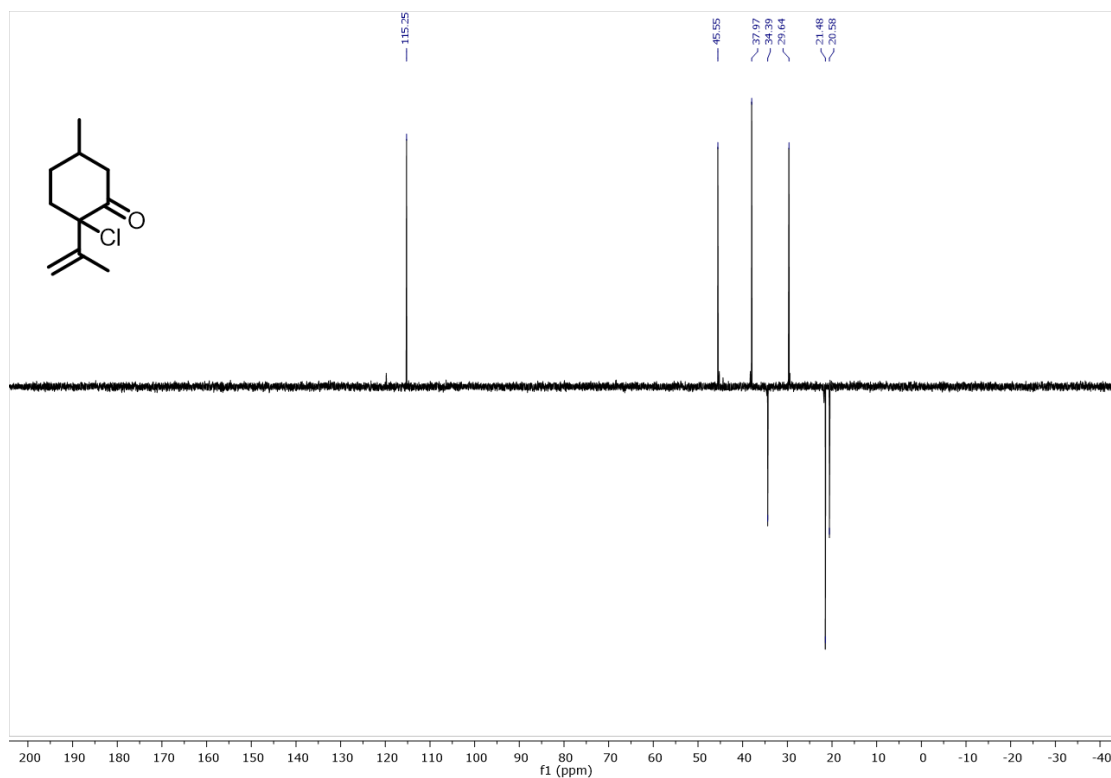

Figure S20: DET 135 spectrum of the pulegone monochloride.

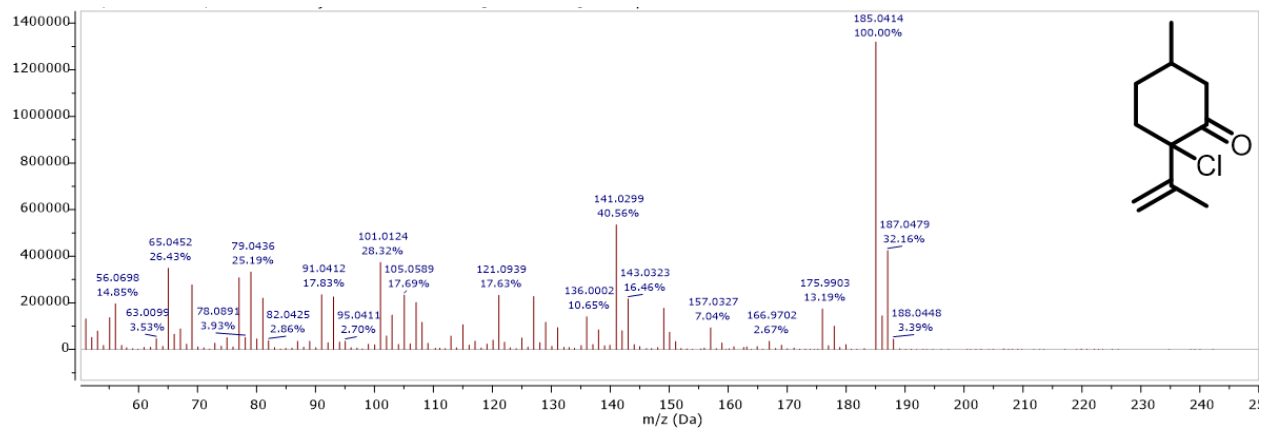

Figure S21: MS spectrum of the pulegone monochloride.

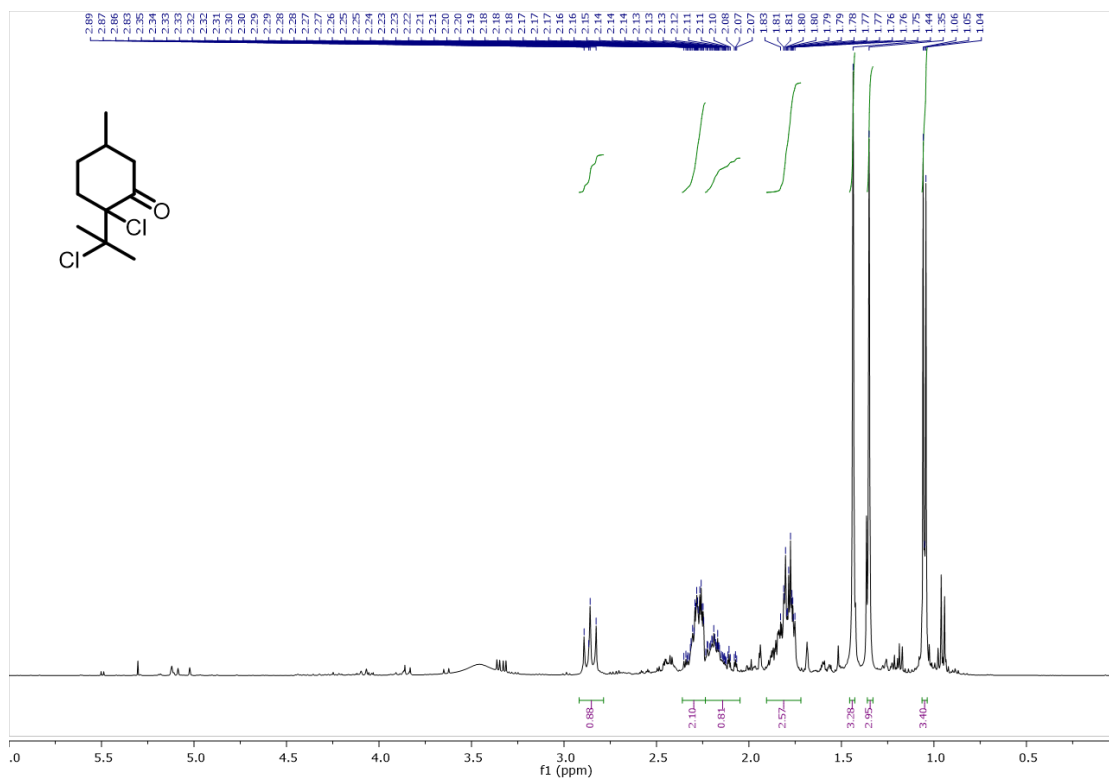

Figure S18:  $^1\text{H}$  NMR spectrum of the pulegone dichloride.

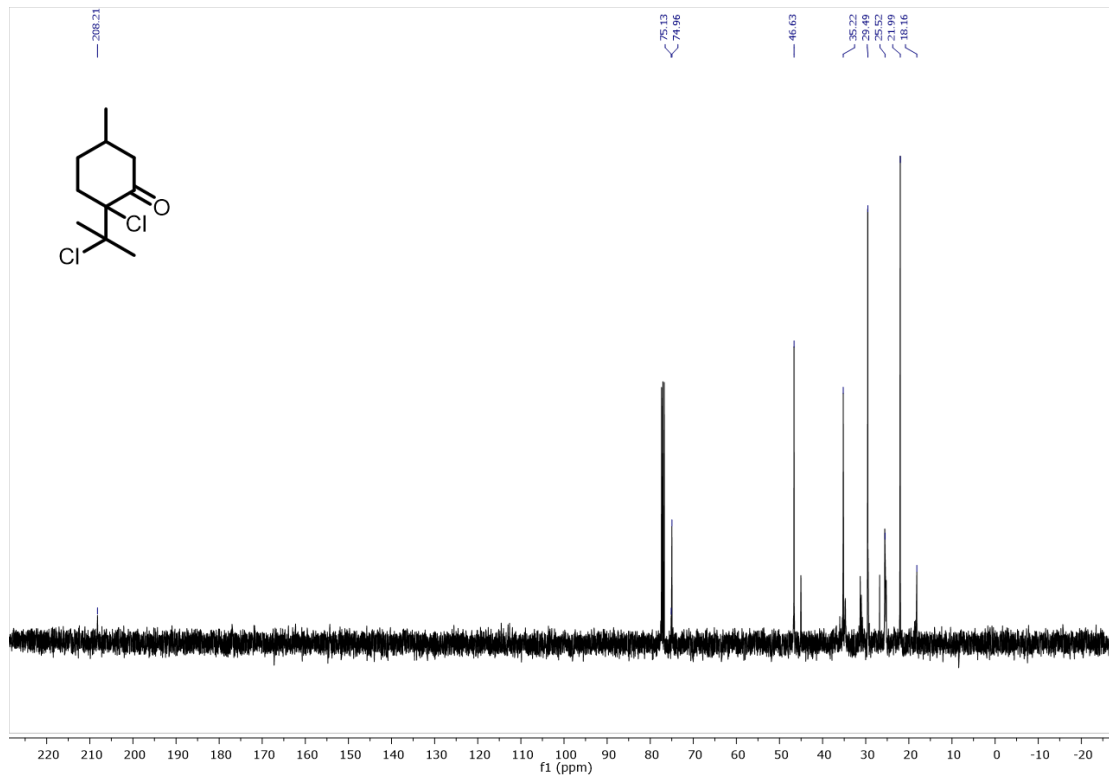

Figure S19:  $^{13}\text{C}$  spectrum of the pulegone dichloride.

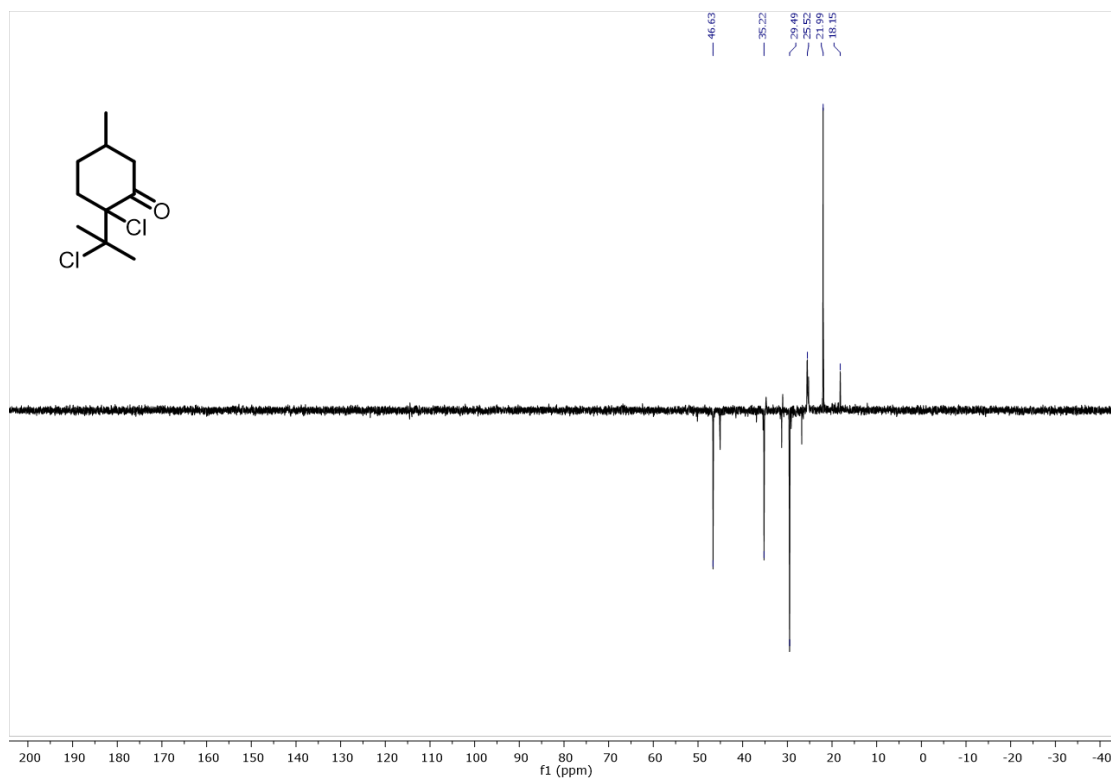

Figure S20: DET 135 spectrum of the pulegone dichloride.

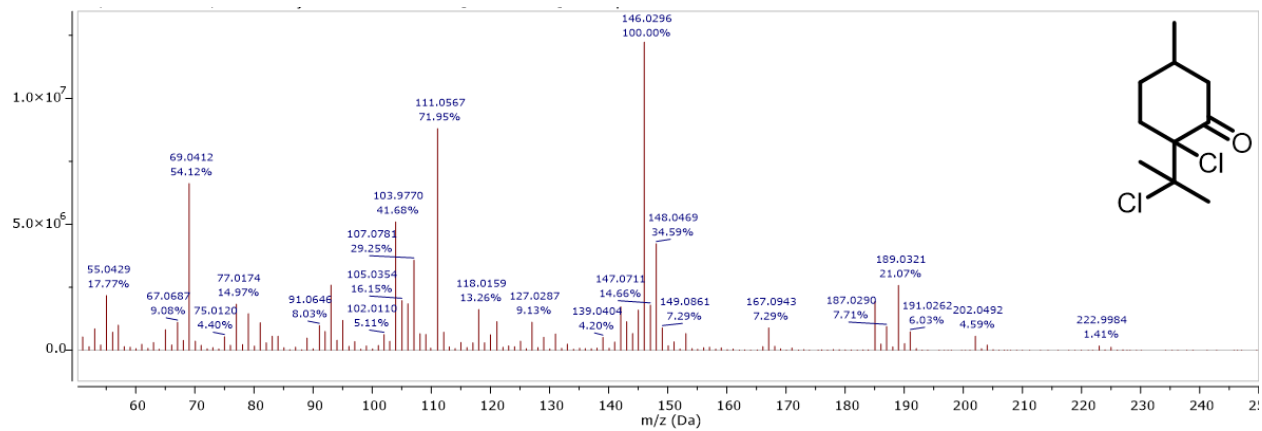

Figure S21: MS spectrum of the pulegone dichloride.

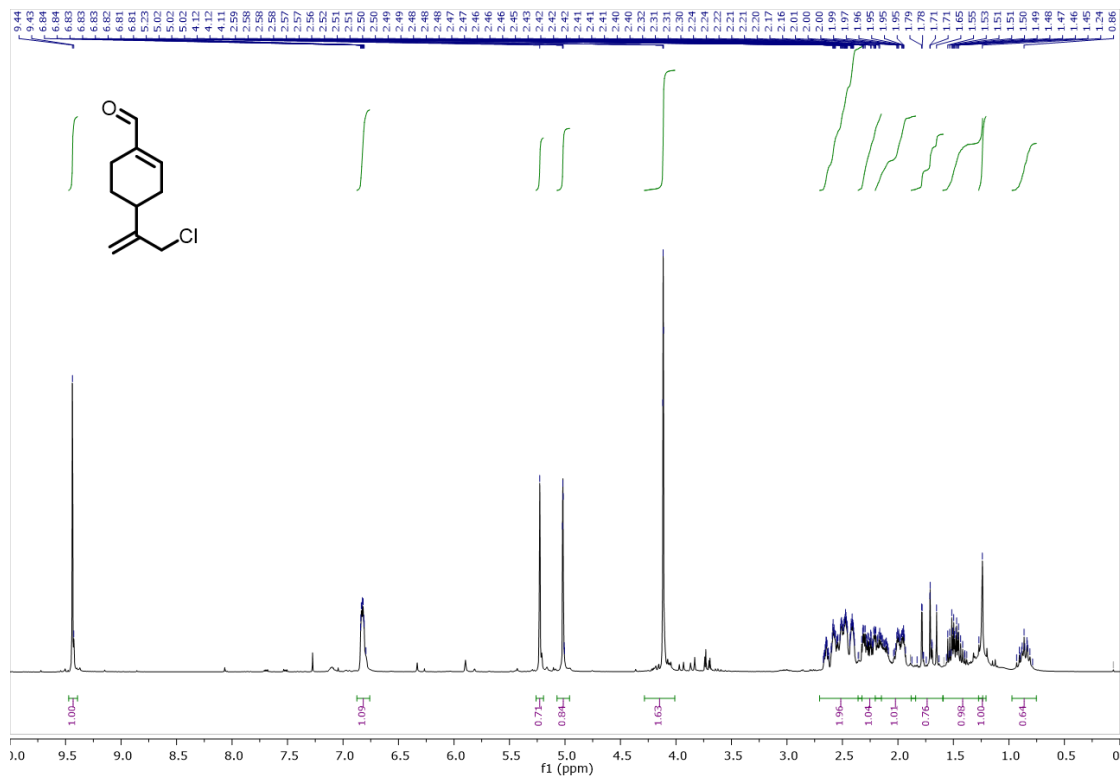

Figure S22:  $^1\text{H}$  NMR spectrum of the perillyl aldehyde monochloride.

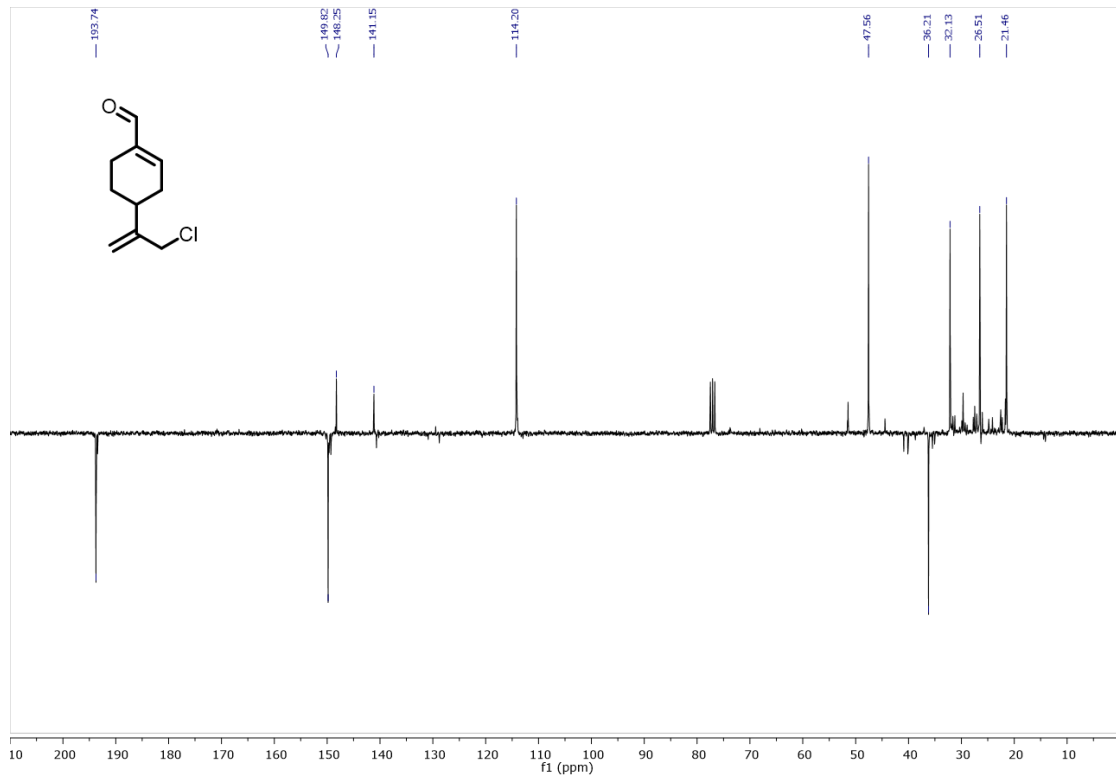

Figure S23: APT spectrum of the perillyl aldehyde monochloride.

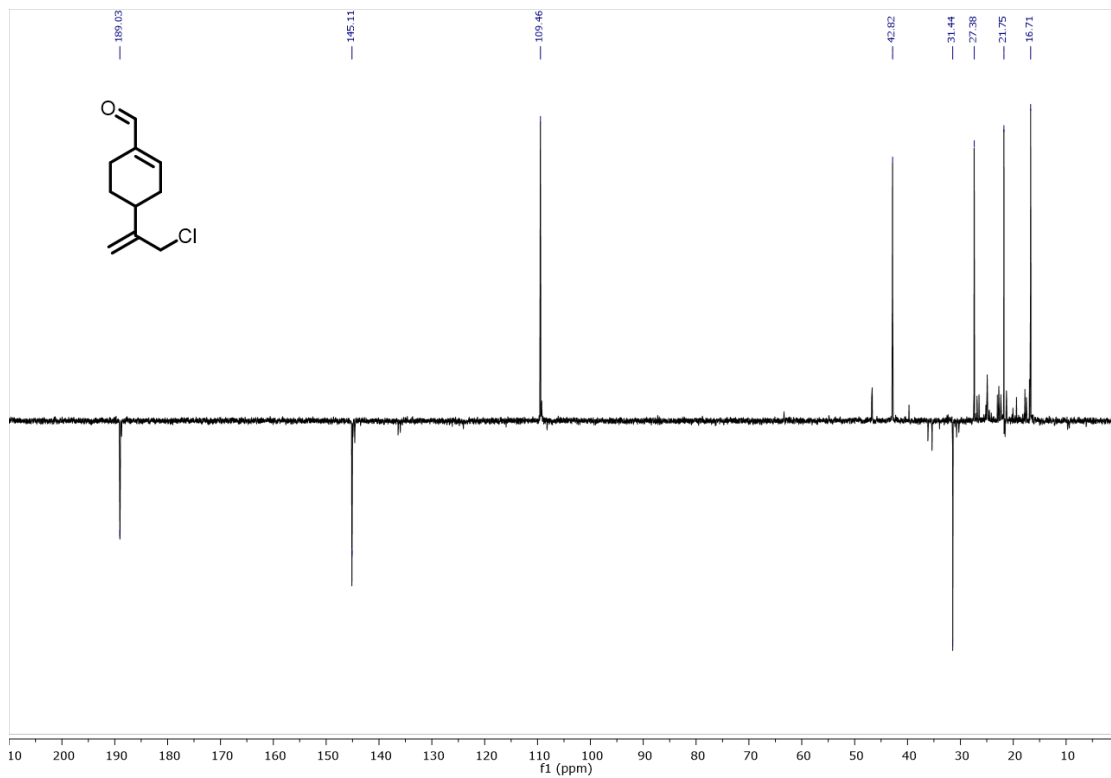

Figure S24: DET 135 spectrum of the perillyl aldehyde monochloride.

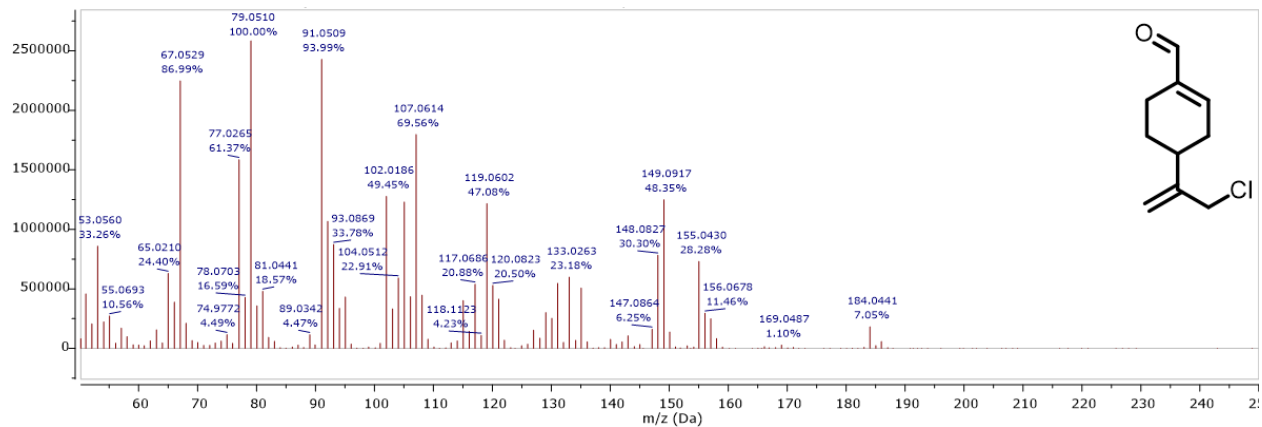

Figure S25: MS spectrum of the perillyl aldehyde monochloride.

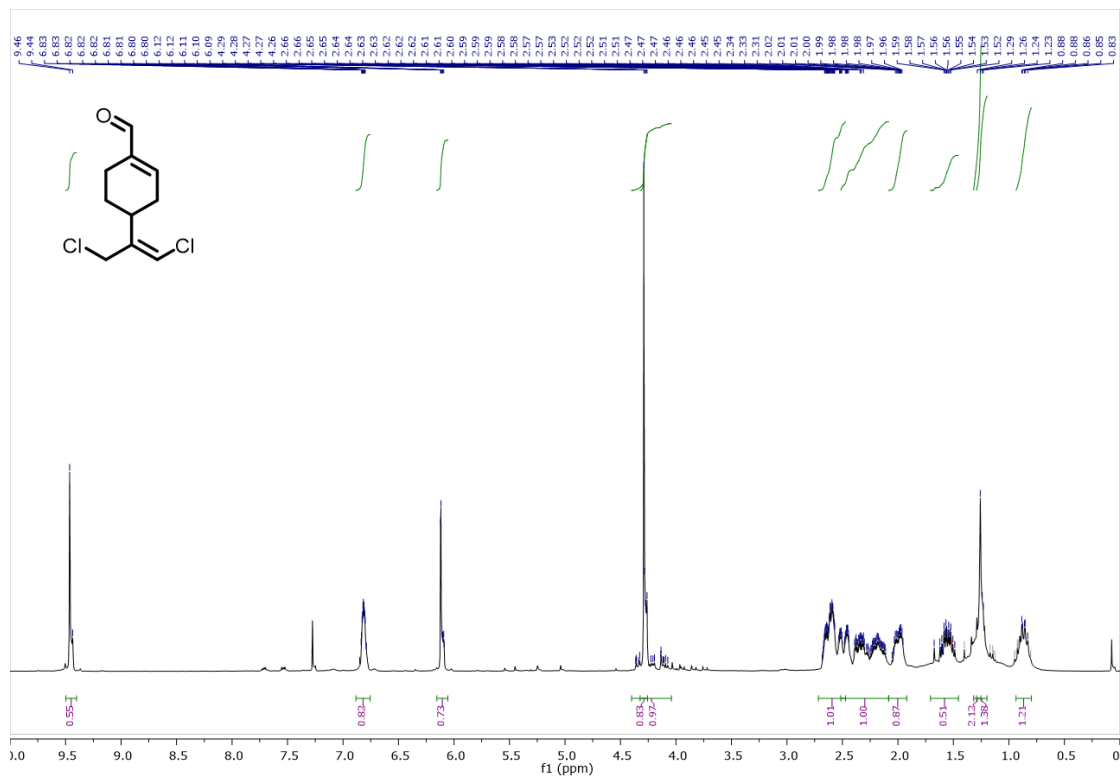

Figure S26: <sup>1</sup>H NMR spectrum of the perillyl aldehyde vinyl allyl chloride.

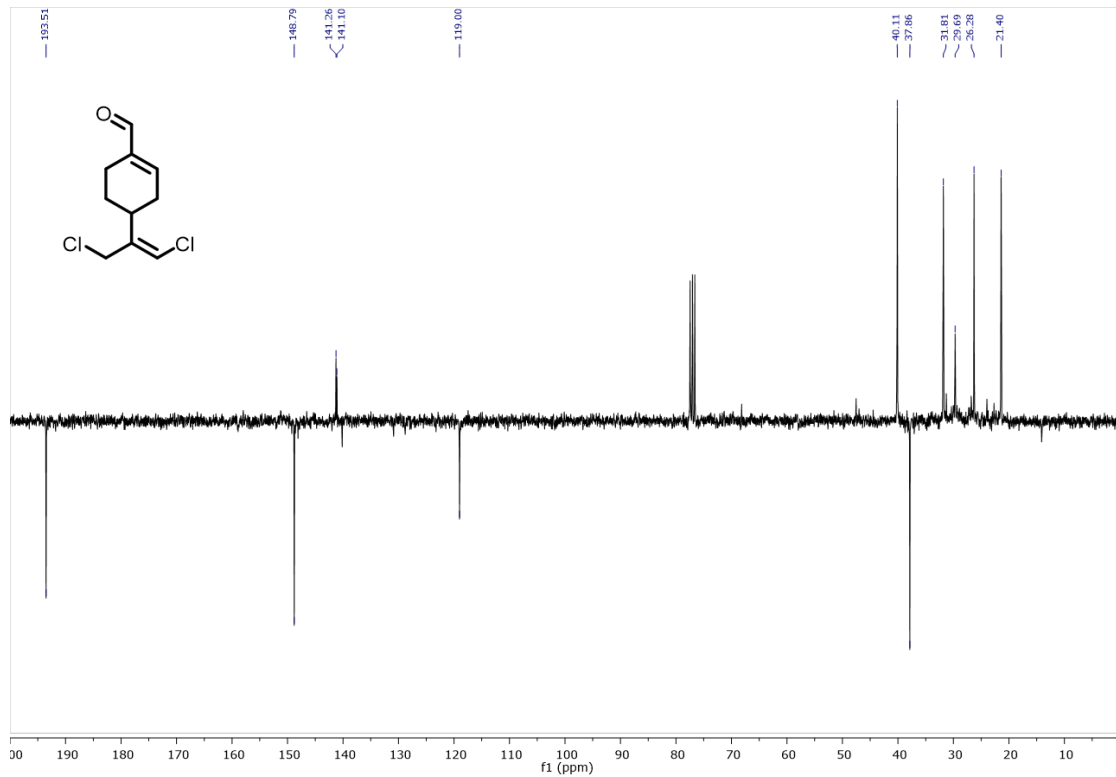

Figure S27: APT spectrum of the perillyl aldehyde vinyl allyl chloride.



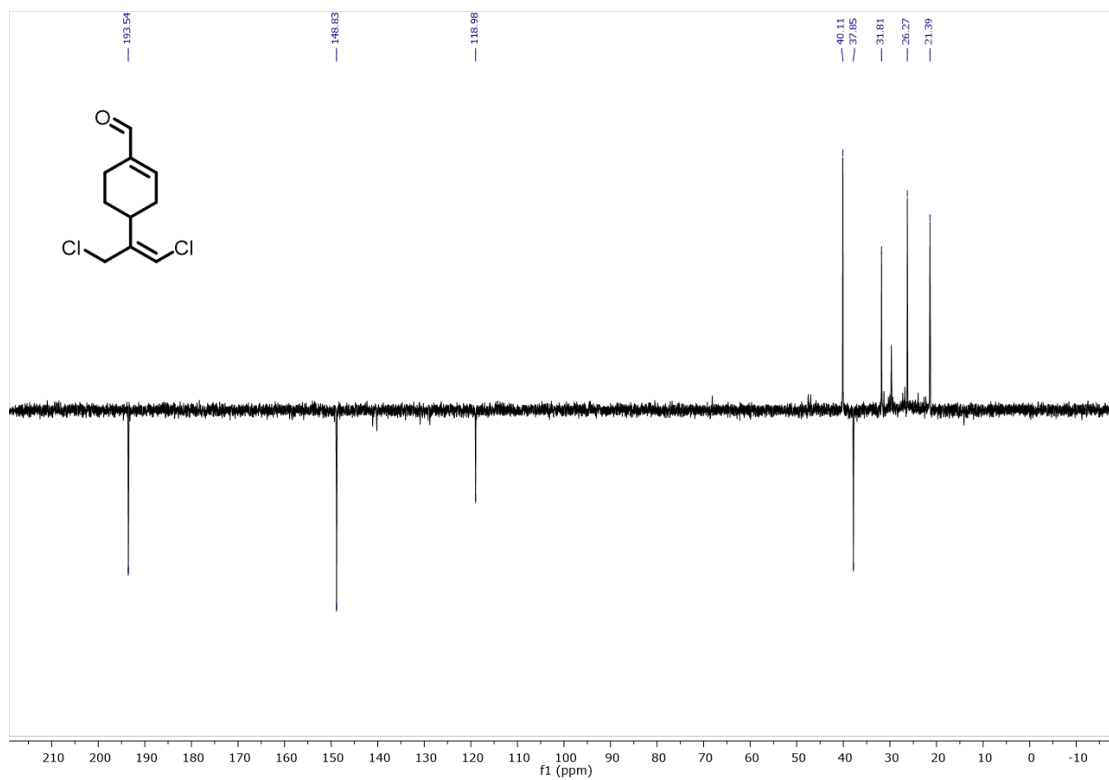

Figure S28: DET 135 spectrum of the perillyl aldehyde vinyl allyl chloride.

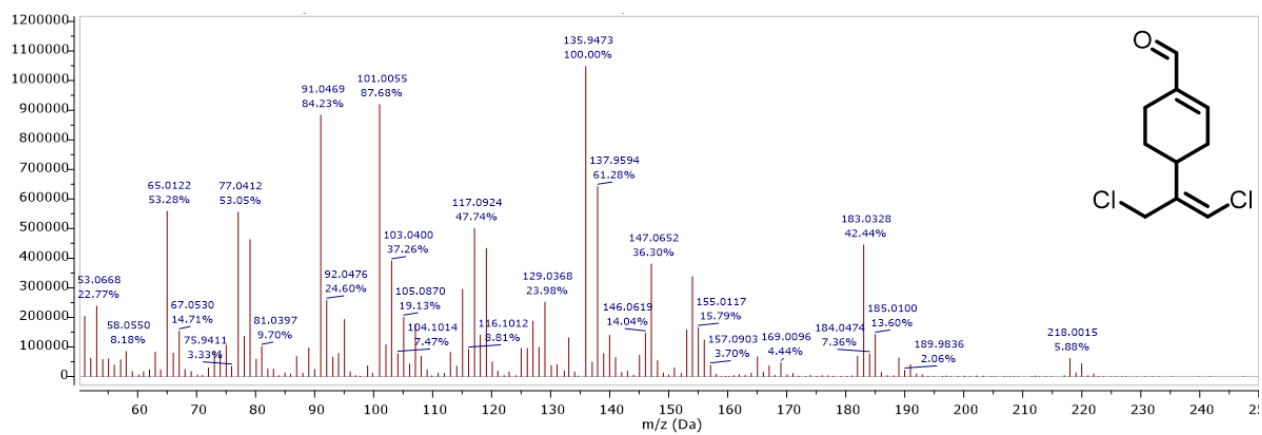

Figure S29: MS spectrum of the perillyl aldehyde vinyl allyl chloride.

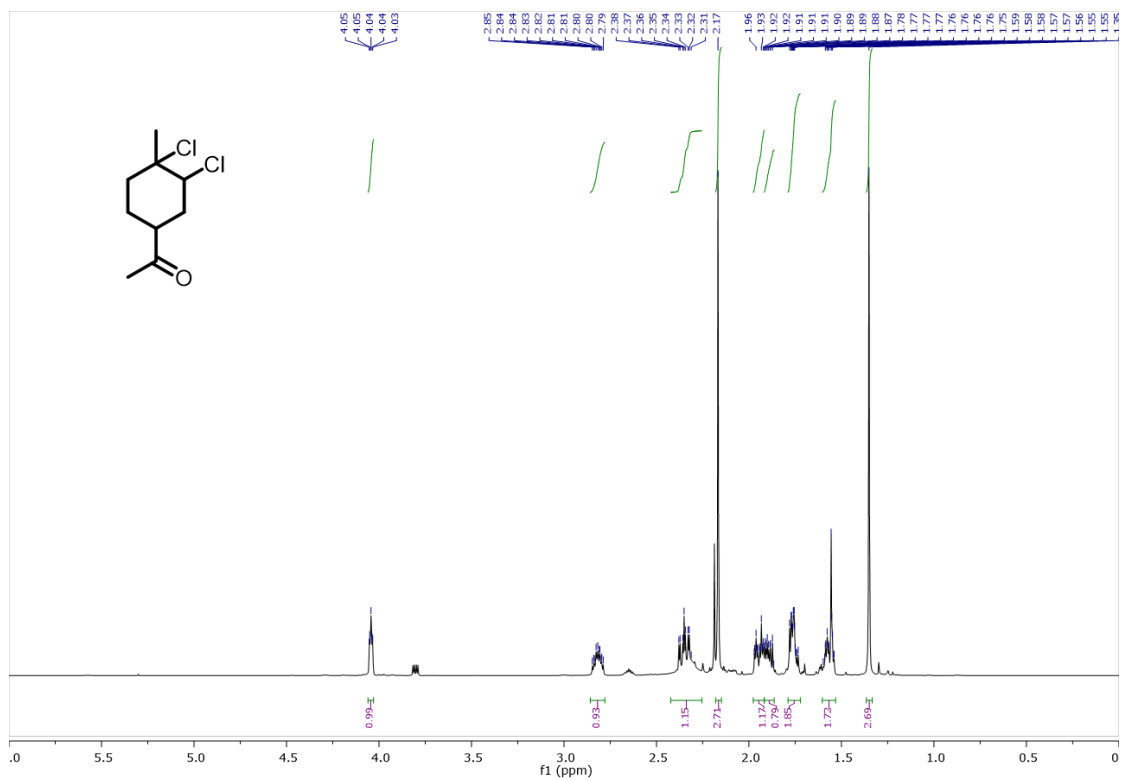

Figure S30:  $^1\text{H}$  NMR spectrum of the limonaketone dichloride.

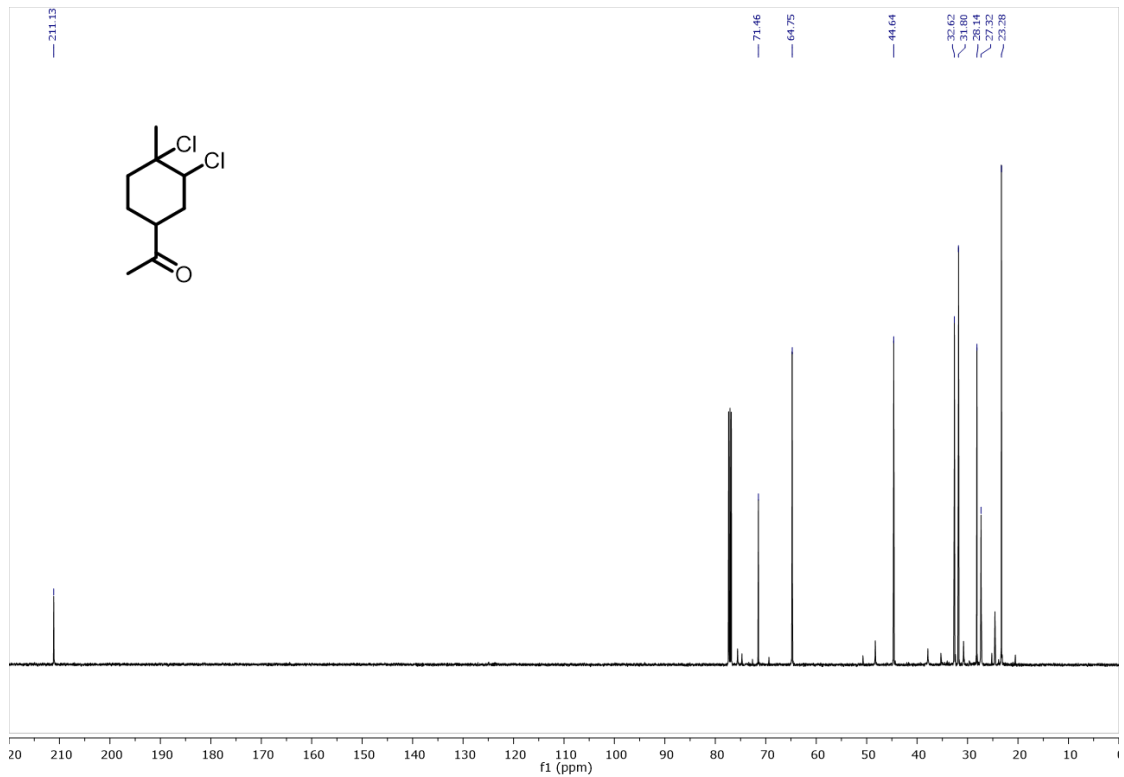

Figure S31:  $^{13}\text{C}$  spectrum of the limonaketone dichloride.

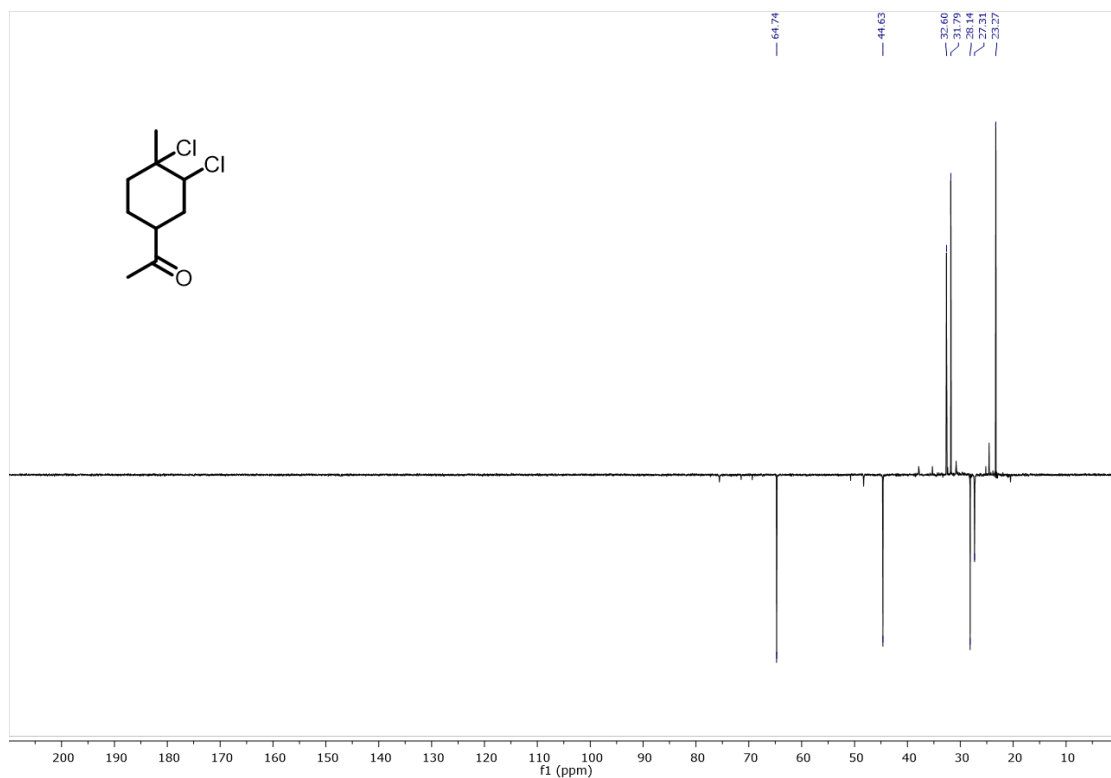

Figure S32: DET 135 spectrum of the limonaketone dichloride.

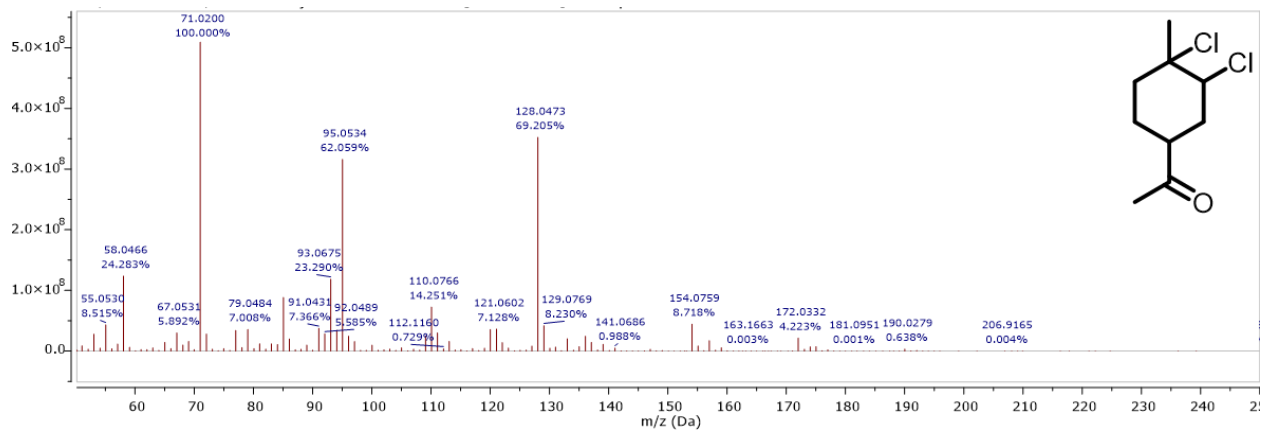

Figure S33: MS spectrum of the limonaketone dichloride.

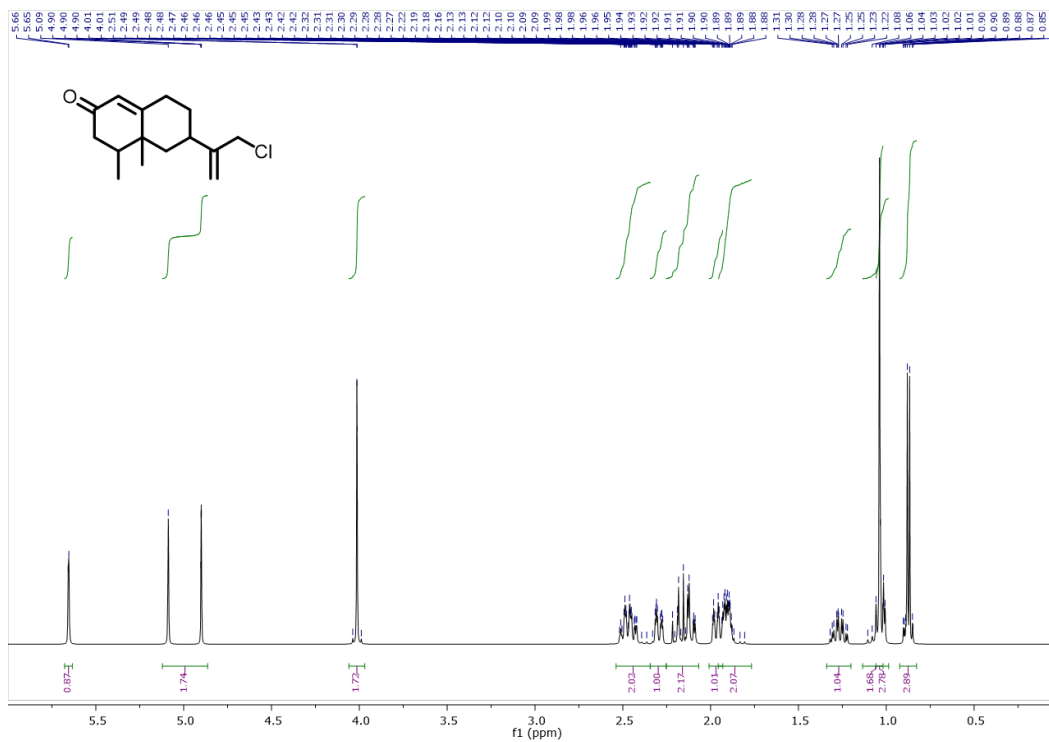

Figure S34: <sup>1</sup>H NMR spectrum of the nootkatone monochloride.

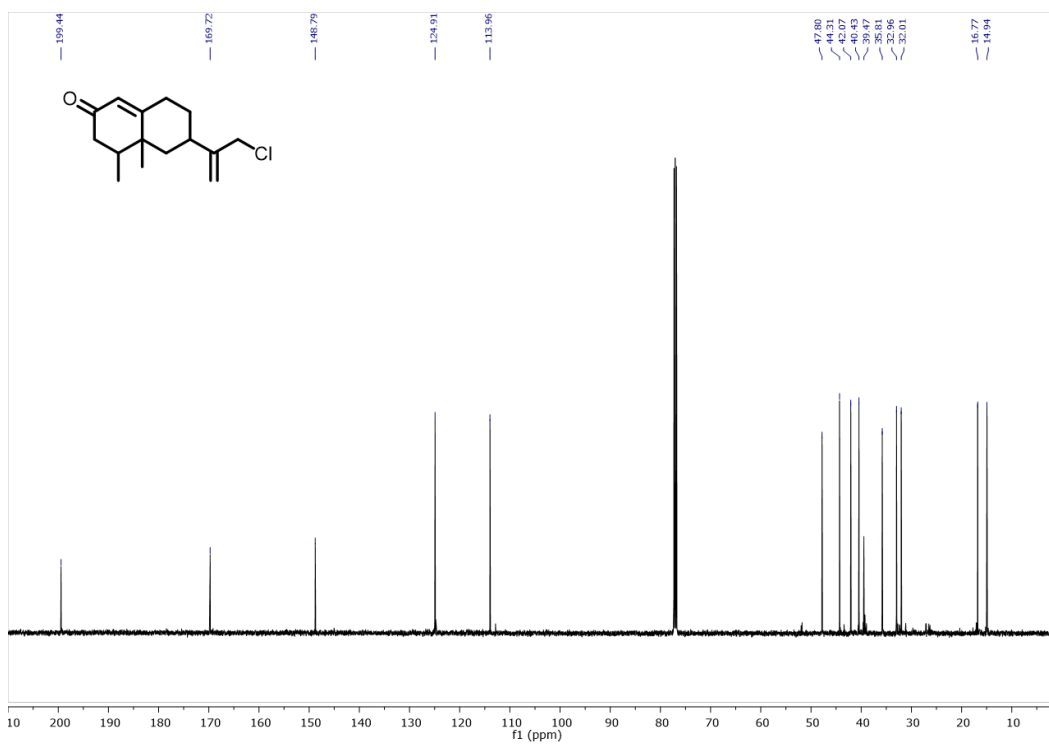

Figure S35: <sup>13</sup>C spectrum of the nootkatone monochloride.

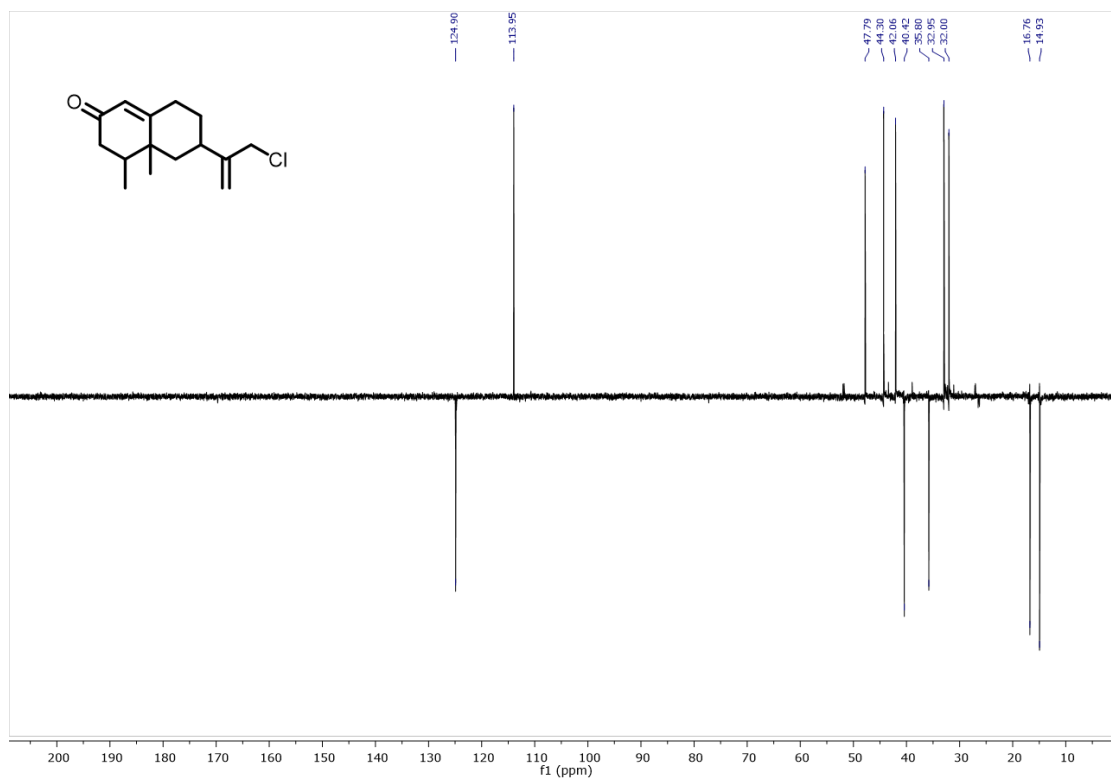

Figure S36: DET 135 spectrum of the nootkatone monochloride.

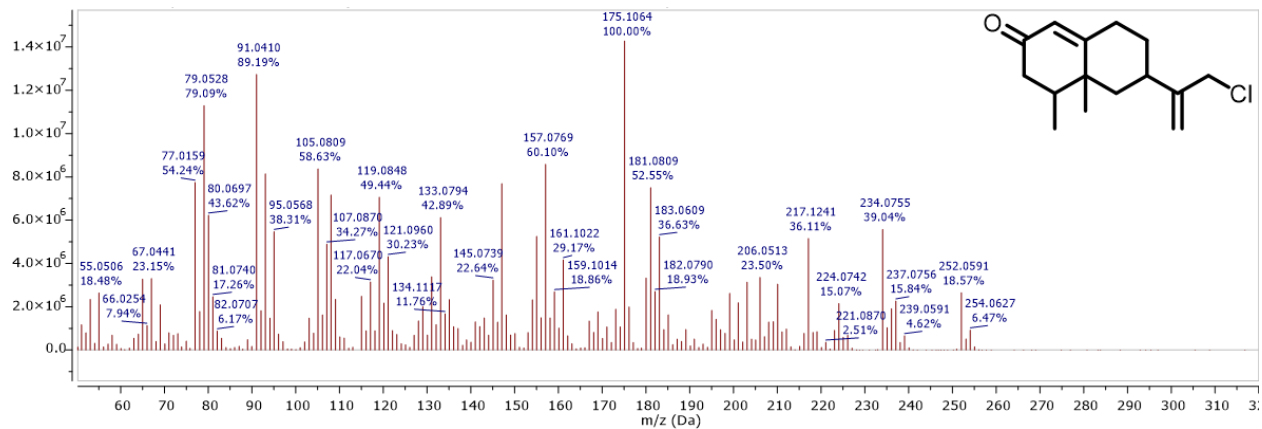

Figure S37: MS spectrum of the nootkatone monochloride.

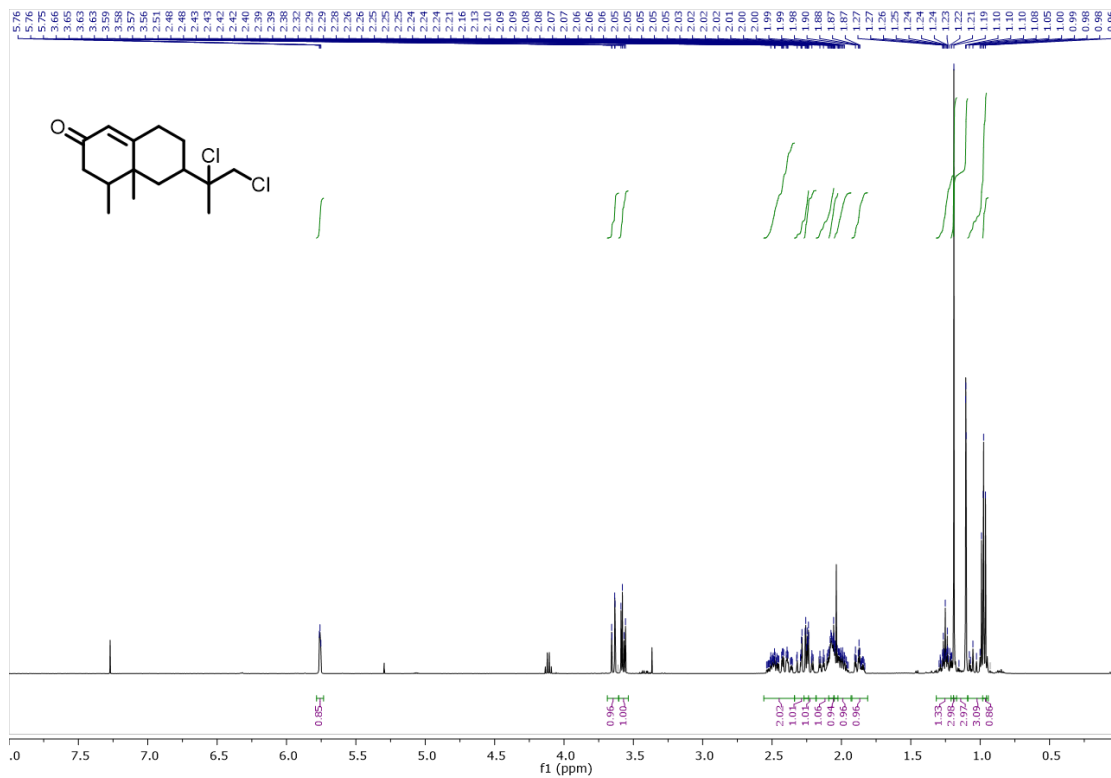

Figure S38:  $^1\text{H}$  NMR spectrum of the nootkatone dichloride.

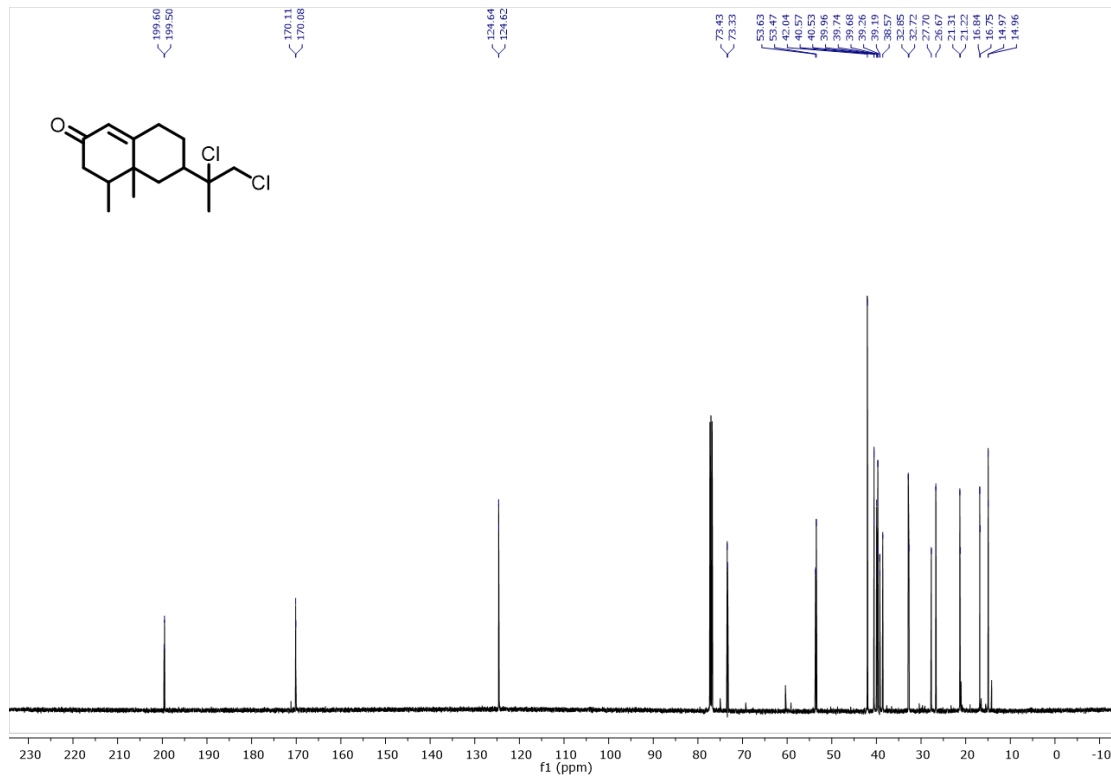

Figure S39:  $^{13}\text{C}$  spectrum of the nootkatone dichloride.

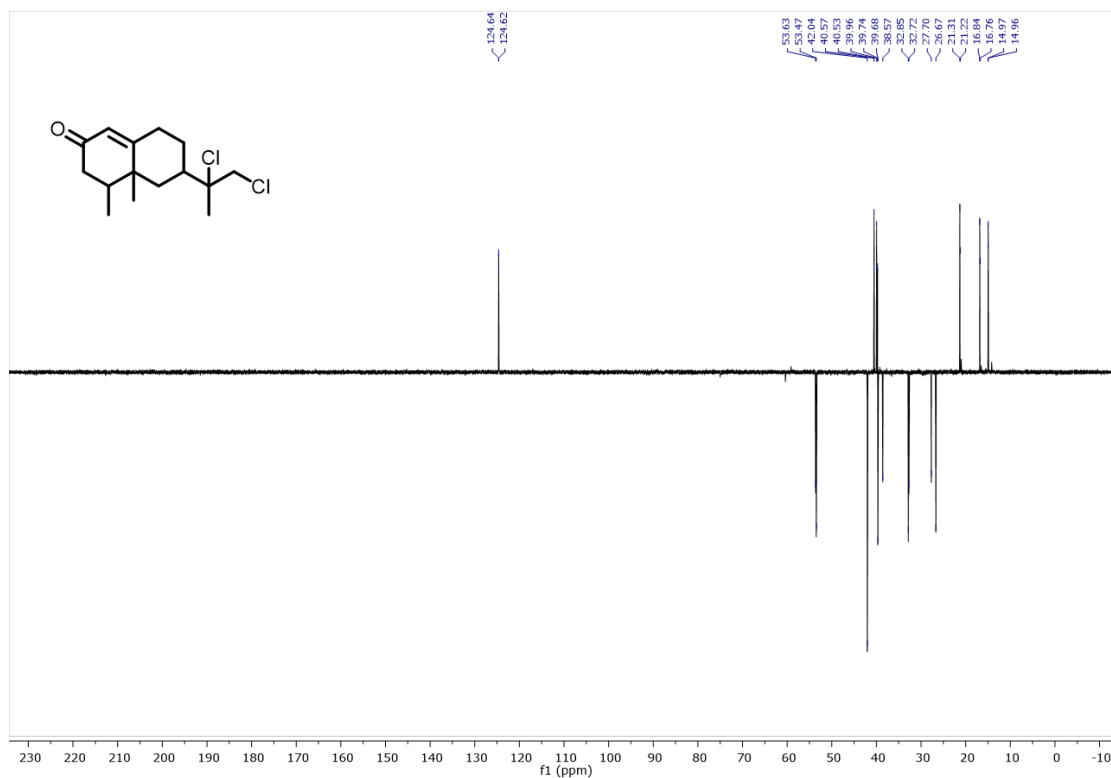

Figure S40: DET 135 spectrum of the nootkatone dichloride.

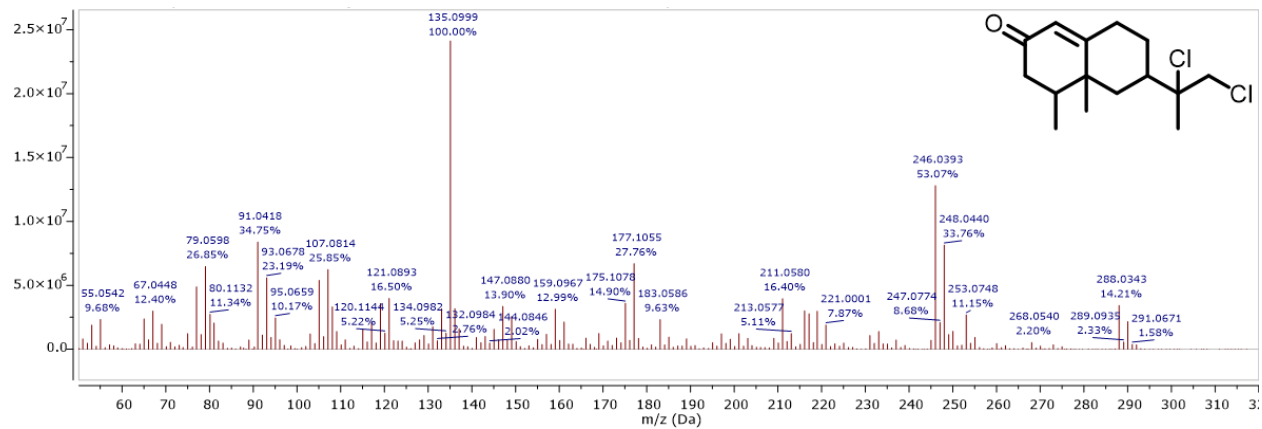

Figure S41: MS spectrum of the nootkatone dichloride.
